# Supplementary material for: Effect of a Rumen-Protected Microencapsulated Supplement from Linseed Oil on the Growth Performance, Meat Quality, and Fatty Acid Composition in Korean Native Steers
Source: MDPI journal article supplement (doi:10.3390/ani11051253), 2021-04-27
Supplement: s1 [file s1]

**Scheme 1.** Hematological analyses of blood in steers supplemented with concentrate containing 3% rumen-protected microencapsulated supplement (MO).

| Items                                                  | CON   | 3% MO <sup>1</sup> | <i>p</i> -Value |
|--------------------------------------------------------|-------|--------------------|-----------------|
| Lymphocyte (2.5–7.5 K/uL)                              |       |                    |                 |
| Day 0                                                  | 7.87  | 9.46               | 0.463           |
| Day180                                                 | 4.93  | 5.55               | 0.480           |
| Monocyte (0–0.84 K/uL)                                 |       |                    |                 |
| Day 0                                                  | 0.6   | 0.74               | 0.444           |
| Day180                                                 | 0.32  | 0.11               | 0.267           |
| Granulocyte (0.6–6.7 K/uL)                             |       |                    |                 |
| Day 0                                                  | 2.46  | 2.19               | 0.729           |
| Day180                                                 | 3.33  | 3.60               | 0.656           |
| White blood cell (4–12 K/uL)                           |       |                    |                 |
| Day 0                                                  | 10.93 | 12.39              | 0.462           |
| Day180                                                 | 8.58  | 9.26               | 0.613           |
| Red blood cell (5–10 M/uL)                             |       |                    |                 |
| Day 0                                                  | 9.08  | 8.12               | 0.249           |
| Day180                                                 | 8.72  | 8.27               | 0.556           |
| Hemoglobin (8–15 g/dL)                                 |       |                    |                 |
| Day 0                                                  | 15.45 | 15.15              | 0.601           |
| Day180                                                 | 13.78 | 13.8               | 0.982           |
| Hematocrit (24–46%)                                    |       |                    |                 |
| Day 0                                                  | 38.15 | 37.22              | 0.497           |
| Day180                                                 | 37.75 | 38.79              | 0.735           |
| Mean corpuscular volume (40–60 fL)                     |       |                    |                 |
| Day 0                                                  | 44    | 45.33              | 0.419           |
| Day180                                                 | 45    | 47.5               | 0.276           |
| Mean corpuscular hemoglobin (11–17 pg)                 |       |                    |                 |
| Day 0                                                  | 16.58 | 17.73              | 0.354           |
| Day180                                                 | 15.17 | 16.44              | 0.422           |
| Mean corpuscular hemoglobin concentration (30–36 g/dL) |       |                    |                 |
| Day 0                                                  | 40.48 | 40.60              | 0.796           |
| Day180                                                 | 35.8  | 35.5               | 0.377           |
| Platelet (100–800 K/ul)                                |       |                    |                 |
| Day 0                                                  | 333   | 292.2              | 0.166           |
| Day180                                                 | 264.5 | 267                | 0.894           |

Values are express as means (n = 4). <sup>1</sup>3% MO, 3% MO supplementation to concentrate.
